# Supplementary material for: Short- and long-term temperature responses of soil denitrifier net N 2 O efflux rates, inter-profile N 2 O dynamics, and microbial genetic potentials
Source: Copernicus journal article supplement (doi:10.5194/soil-6-399-2020), 2020-08-26
Supplement: Supplementary file 1 [file soil-6-399-2020-supplement.pdf]

Supplement of SOIL, 6, 399–412, 2020  
<https://doi.org/10.5194/soil-6-399-2020-supplement>  
© Author(s) 2020. This work is distributed under  
the Creative Commons Attribution 4.0 License.

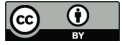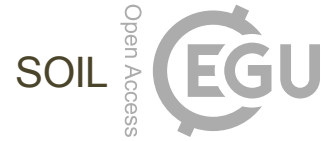

*Supplement of*

## **Short- and long-term temperature responses of soil denitrifier net N<sub>2</sub>O efflux rates, inter-profile N<sub>2</sub>O dynamics, and microbial genetic potentials**

**Kate M. Buckeridge et al.**

*Correspondence to:* Kate M. Buckeridge ([kmbuckeridge@gmail.com](mailto:kmbuckeridge@gmail.com))

The copyright of individual parts of the supplement might differ from the CC BY 4.0 License.

1 **Table S1.** Primer sequences tested in this study for successful amplification with PCR. Bolded primers were successfully amplified  
 2 and selected to assess denitrification functional gene abundance (qPCR) across the three boreal forest regions along a latitudinal  
 3 transect.

| Gene                                                                            | Primer                                | Sequence (5' to 3')                                       | Reference               |
|---------------------------------------------------------------------------------|---------------------------------------|-----------------------------------------------------------|-------------------------|
| Nitrite reductase (NO <sub>2</sub> <sup>-</sup> to NO)<br><i>nirK</i>           | nirK-876F<br>nirK-1040R               | ATY GGC GGV AYG GCG A<br>GCC TCG ATC AGR TTR TGG TT       | Henry et al. 2004       |
| Nitrite reductase (NO <sub>2</sub> <sup>-</sup> to NO)<br><i>nirS</i>           | <b>nirS-cd3aF</b><br><b>nirS-R3cd</b> | GTS AAC GTS AAG GAR ACS GG<br>GAS TTC GGR TGS GTC TTG     | Throbäck et al., 2004   |
| Nitric oxide reductase (NO to N <sub>2</sub> O)<br><i>norB</i>                  | cnorB2F<br>cnorB7R                    | GAC AAG NNN TAC TGG TGG T<br>TGN CCR TGN GCN GCN GT       | Braker and Tiedje, 2003 |
| Nitric oxide reductase (NO to N <sub>2</sub> O)<br><i>nosZ</i>                  | <b>nosZ-F</b><br><b>nosZ-R</b>        | CGY TGT TCM TCG ACA GCC AG<br>CAT GTG CAG NGC RTG GCA GAA | Röche et al., 2002      |
| Nitrous oxide reductase (N <sub>2</sub> O to N <sub>2</sub> )<br><i>nosZ II</i> | nosZ-II-F<br>nosZ-II-R                | CTI GGI CCI YTK CAY AC<br>GCI GAR CAR AAI TCB GTR C       | Jones et al., 2013      |

4

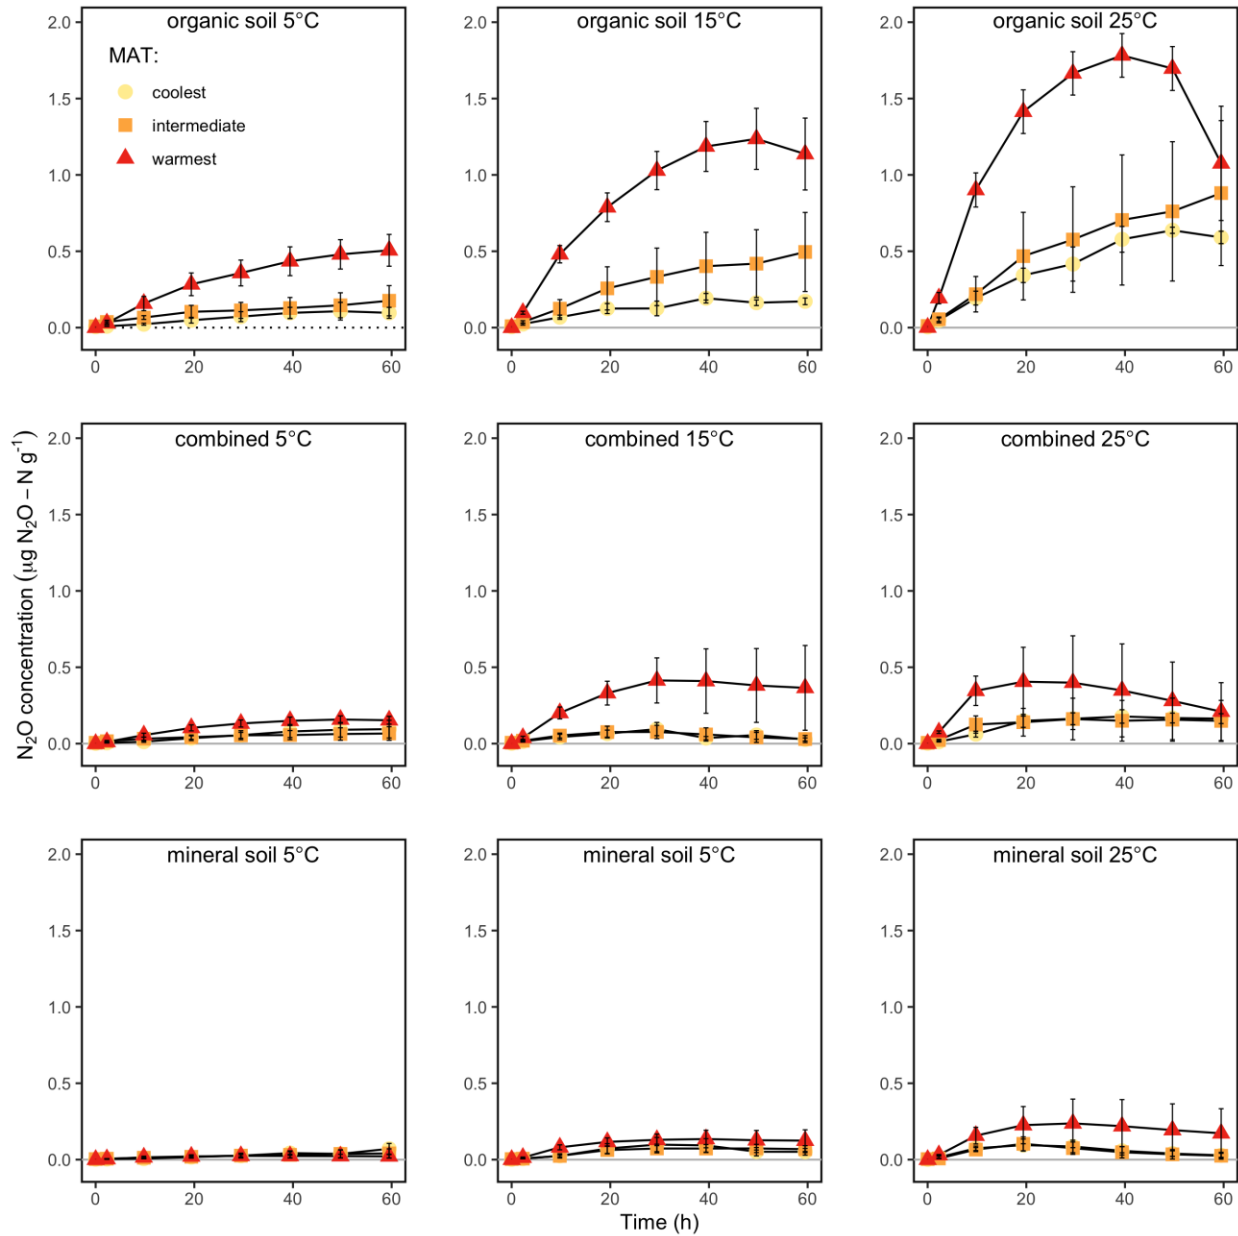

5

6 **Figure S1.** N<sub>2</sub>O-N concentrations in the headspace of organic, mineral, and combined profiles  
 7 from three boreal forest regions during a 60-hr incubation at 5, 15, and 25°C. 'Combined' refers  
 8 to incubations with organic and mineral soil in the same jar, physically isolated but with shared  
 9 headspace. 'MAT' = mean annual temperature; the 'coolest' region is the Eagle River watershed  
 10 (northern boreal), the 'intermediate' region is the Salmon River watershed (mid-boreal), and  
 11 the 'warmest' region is the Grand Codroy watershed (southern boreal). See text for description  
 12 of sites. Values provided as the mean ± one standard error (n=3).
